# Supplementary material for: The spring-loaded genome: Nucleosome redistributions are widespread, transient, and DNA-directed
Source: HighWire-hosted journal article supplement (doi:10.1101/gr.160150.113), 2013-12-05
Supplement: Supplemental_Figure1Legend.pdf [file Supplemental_Figure1Legend.pdf]

## Sexton et al. \_ Supplementary Figure 1

Supp. Fig. 1. Measured nucleosome distributions of pairwise comparisons of the 0 hours, 6 hours, 12 hours, 24 hours, and 48 hours for all genes tested. The x-axis represents genomic position showing 2 kb centered on a TSS. The y-axis is the  $\log_2$  ratio of nucleosomally protected DNA to genomic DNA signal at each probe on the microarray. Supp. Fig. 11 is attached as a pdf file.
