# Supplementary material for: The spring-loaded genome: Nucleosome redistributions are widespread, transient, and DNA-directed
Source: HighWire-hosted journal article supplement (doi:10.1101/gr.160150.113), 2013-12-05
Supplement: Supplemental_Figure3.pdf [file Supplemental_Figure3.pdf]

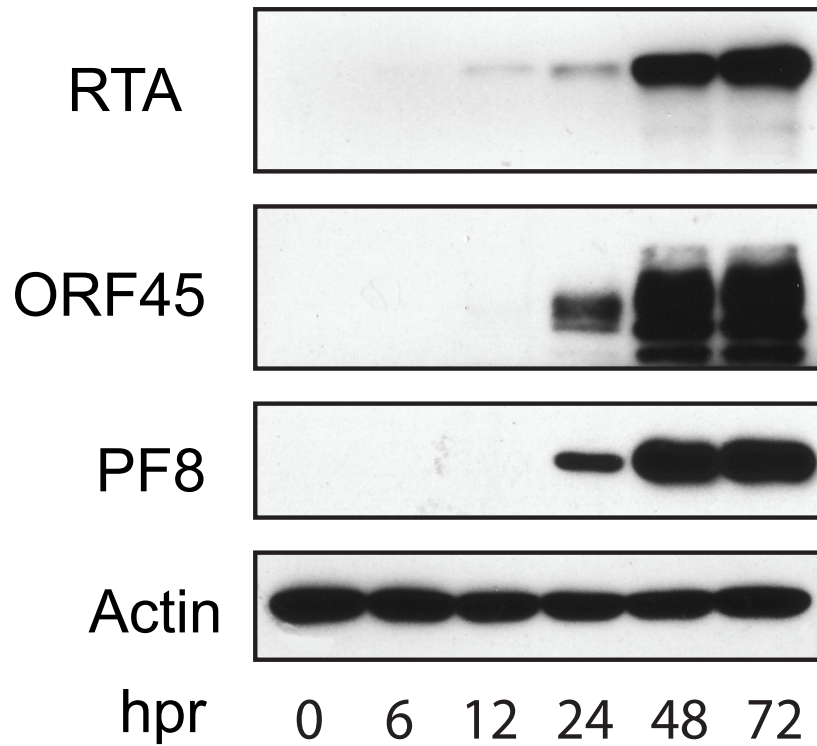

Supp. Fig. 3. Western blots with the specified antibodies, at various times (in hours) after KSHV reactivation (hpr), of iSLK.219 cells treated with 0.2  $\mu$ g/ml doxycycline. RTA, ORF45, and PF8 are included to confirm KSHV reactivation. Beta actin is included as a loading control.
