# Supplementary material for: The spring-loaded genome: Nucleosome redistributions are widespread, transient, and DNA-directed
Source: HighWire-hosted journal article supplement (doi:10.1101/gr.160150.113), 2013-12-05
Supplement: Supplemental_Figure4.pdf [file Supplemental_Figure4.pdf]

Sexton et al. \_ Supplementary Figure 4

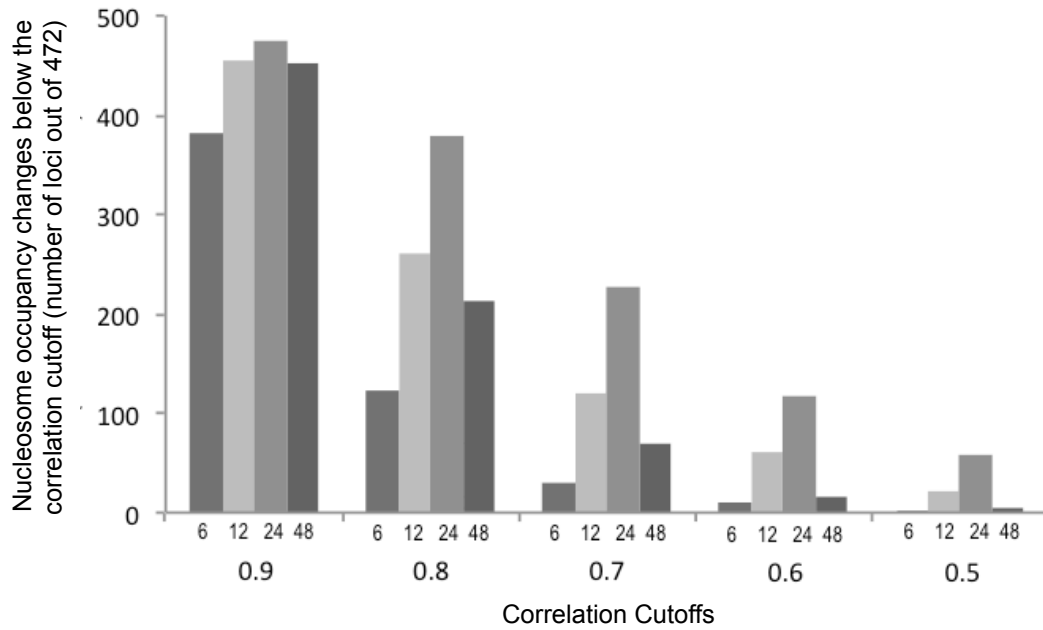

Supp. Fig. 4. Nucleosome distribution changes in loci 6, 12, 24, and 48 hours post reactivation of Kaposi's sarcoma-associated herpesvirus (KSHV) at multiple cutoffs including 0.5, 0.6, 0.7, 0.8, and 0.9. The most discriminative correlation cutoff amongst the timepoints was  $r=0.7$ .
