# Supplementary material for: The spring-loaded genome: Nucleosome redistributions are widespread, transient, and DNA-directed
Source: HighWire-hosted journal article supplement (doi:10.1101/gr.160150.113), 2013-12-05
Supplement: Supplemental_Figure5.pdf [file Supplemental_Figure5.pdf]

Sexton et al. \_ Supplementary Figure 5

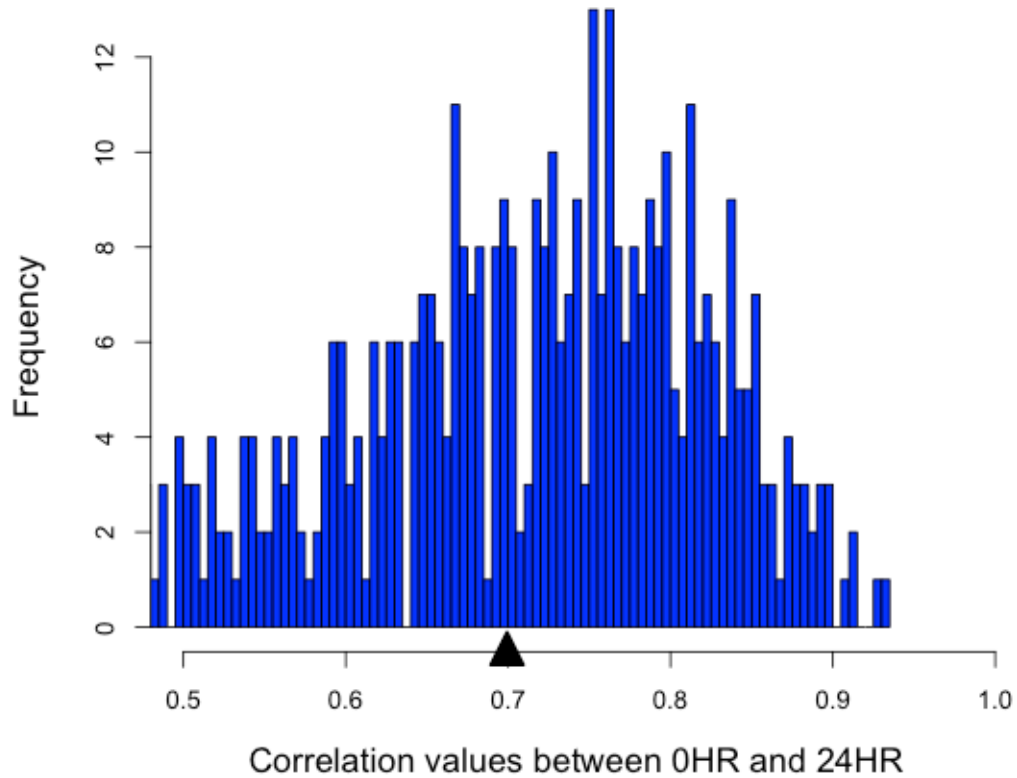

Supp. Fig. 5. Frequency histogram of the correlation values between the 0 and 24 hours for all 472 genes. The histogram of correlations show a natural dip at  $r=0.7$ . The correlation cutoff of 0.7 (black arrow) was used for all analyses.
