# Supplementary material for: The spring-loaded genome: Nucleosome redistributions are widespread, transient, and DNA-directed
Source: HighWire-hosted journal article supplement (doi:10.1101/gr.160150.113), 2013-12-05
Supplement: Supplemental_Figure6.pdf [file Supplemental_Figure6.pdf]

## Sexton et al. \_ Supplementary Figure 6

Supp. Fig. 6. In addition to our analysis using correlation coefficient, we have developed a wavelet based statistic in parallel to determine differences between the 0 hour timepoint and all timepoints following KSHV reactivation (Girimurugan and Chicken, 2013). The statistic is capable of detecting changes of very small magnitudes and has been proven to be effective in comparing functional responses. The statistic demonstrates good power in detecting differences when compared to existing multivariate tests (for example, the Hotelling T2 test). We implemented the statistic as an ANOVA to determine changes simultaneously among multiple multivariate profiles with high power and a good control of the Type-I error. The statistic has a well-defined probability distribution and p-values are obtained using Central Limit Theorem methods. Our Wavelet ANOVA (WANOVA) method manuscript is currently in preparation for submission to PLoS Computational Biology. The WANOVA result is consistent with the correlation coefficient (threshold 0.7) results.
