# Supplementary material for: The spring-loaded genome: Nucleosome redistributions are widespread, transient, and DNA-directed
Source: HighWire-hosted journal article supplement (doi:10.1101/gr.160150.113), 2013-12-05
Supplement: Supplemental_Figure7.pdf [file Supplemental_Figure7.pdf]

Sexton et al. \_ Supplementary Figure 7

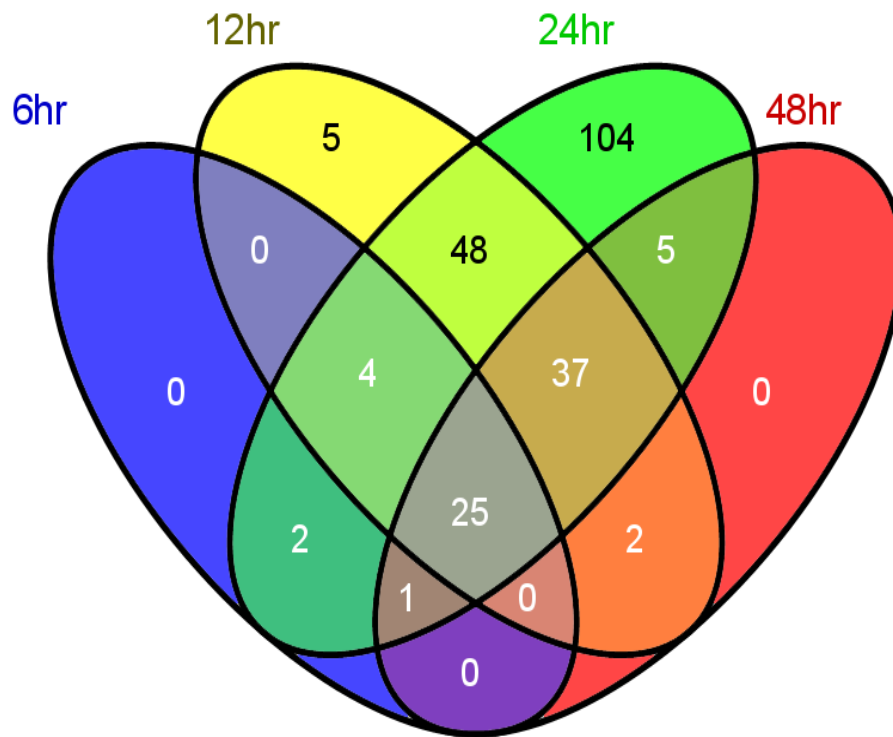

Supp. Fig. 7. Time points post KSHV reactivation show unique and shared loci with altered nucleosome distribution.
