# Supplementary material for: The spring-loaded genome: Nucleosome redistributions are widespread, transient, and DNA-directed
Source: HighWire-hosted journal article supplement (doi:10.1101/gr.160150.113), 2013-12-05
Supplement: Supplemental_Figure8.pdf [file Supplemental_Figure8.pdf]

Sexton et al. \_ Supplementary Figure 8

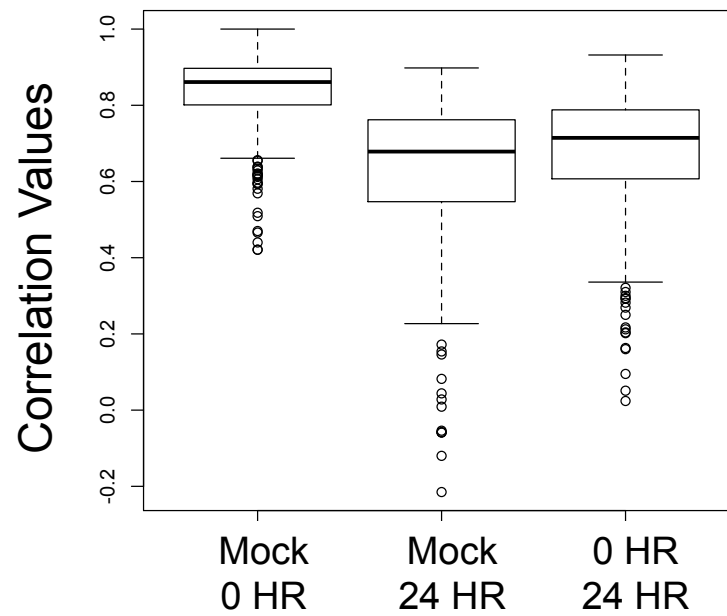

Supp. Fig. 8. Boxplot of correlations with the 0 hours and 24 hours post KSHV reactivation with the control iSLK cells (Mock). No significant chromatin structural changes were observed between the 0 hours and the control cells (Mock). This control confirmed that the changes observed in the iSLK.219 cells are due to the reactivation of KSHV.
