# Supplementary material for: The spring-loaded genome: Nucleosome redistributions are widespread, transient, and DNA-directed
Source: HighWire-hosted journal article supplement (doi:10.1101/gr.160150.113), 2013-12-05
Supplement: Supplemental_Figure9.pdf [file Supplemental_Figure9.pdf]

Sexton et al. \_ Supplementary Figure 9

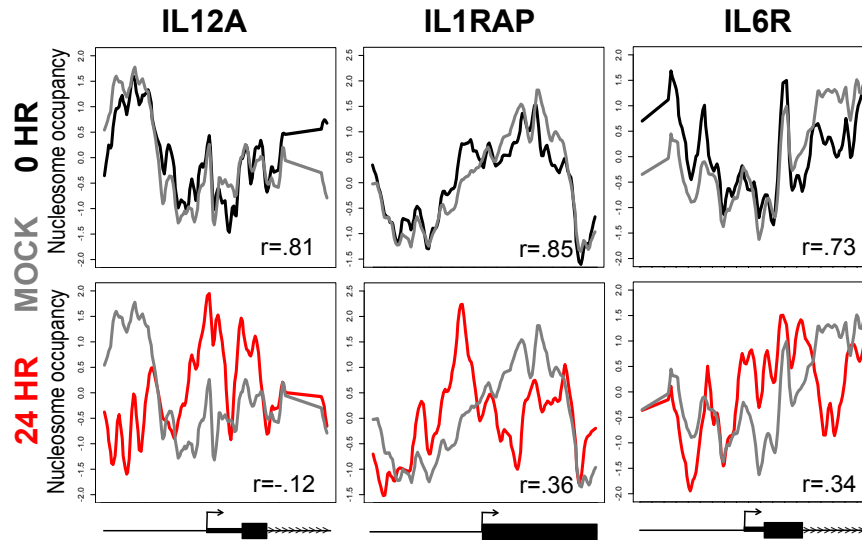

Supp. Fig. 9. Measured nucleosome distributions comparing the control cells (mock) to the 0 hours and 24 hours. The nucleosome distributions from 0 hours (black lines), 24 hours post KSHV reactivation (red lines), and mock (control cells, gray lines) for the same three genes shown in Fig. 1D. The x-axis represents genomic position showing 2 kb centered on a TSS. The y-axis is the log<sub>2</sub> ratio of nucleosomally protected DNA to genomic DNA signal at each probe on the microarray. These plots show strong agreement between the control cells (mock) and the 0 hours. Gene models from the RefSeq annotations are shown below each gene column.
