# Supplementary material for: The spring-loaded genome: Nucleosome redistributions are widespread, transient, and DNA-directed
Source: HighWire-hosted journal article supplement (doi:10.1101/gr.160150.113), 2013-12-05
Supplement: Supplemental_Figure10.pdf [file Supplemental_Figure10.pdf]

**Sexton et al. \_ Supplementary Figure 10**

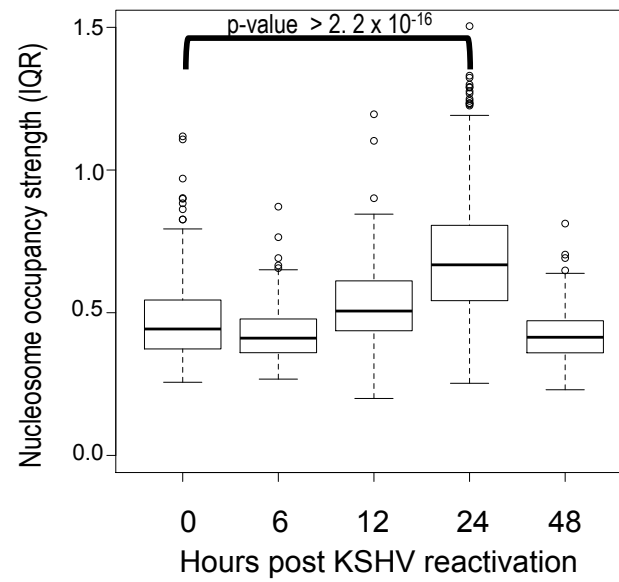

Supp. Fig. 10. Changes in response to KSHV reactivation lead to stronger nucleosome occupancy. The effect is maximal 24 hours post reactivation.
