# Supplementary material for: The spring-loaded genome: Nucleosome redistributions are widespread, transient, and DNA-directed
Source: HighWire-hosted journal article supplement (doi:10.1101/gr.160150.113), 2013-12-05
Supplement: Supplemental_Figure11.pdf [file Supplemental_Figure11.pdf]

**Sexton et al. \_ Supplementary Figure 11**

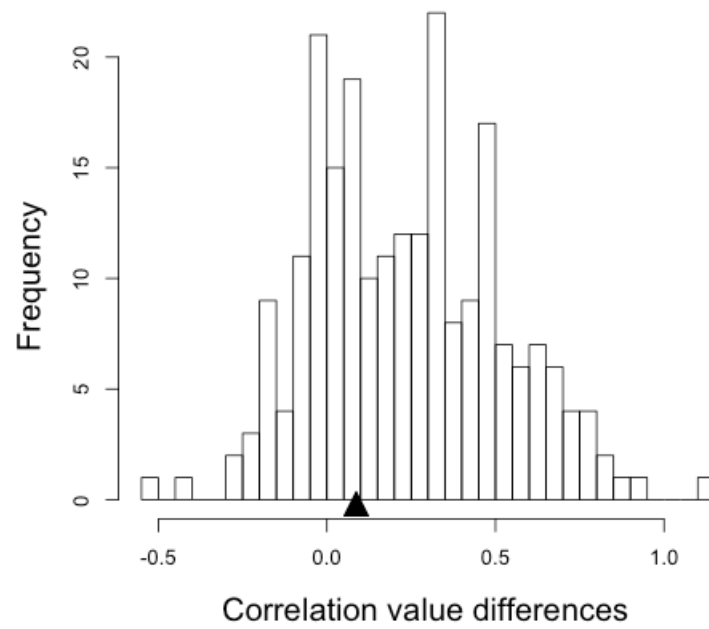

Supp. Fig. 11. Frequency histogram of the difference in the correlation values between the 0 hours with the predicted model, and the correlation values between 24 hours with the predicted model for all genes that changed in nucleosome distribution.
