# Supplementary material for: The spring-loaded genome: Nucleosome redistributions are widespread, transient, and DNA-directed
Source: HighWire-hosted journal article supplement (doi:10.1101/gr.160150.113), 2013-12-05
Supplement: Supplemental_Figure12Legend.pdf [file Supplemental_Figure12Legend.pdf]

## Sexton et al. \_ Supplementary Figure 12

Supp. Fig. 12. Measured nucleosome distributions comparing the control 0 hours, 24 hours, and Predicted (iSVM) for all genes tested. The x-axis represents genomic position showing 2 kb centered on a TSS. The y-axis is the  $\log_2$  ratio of nucleosomally protected DNA to genomic DNA signal at each probe on the microarray. These plots show strong agreement between the 24 hours and the Predicted (iSVM), for the genes classified as DNA-Directed. Supp. Fig. 11 is attached as a pdf file.
