# Supplementary material for: The spring-loaded genome: Nucleosome redistributions are widespread, transient, and DNA-directed
Source: HighWire-hosted journal article supplement (doi:10.1101/gr.160150.113), 2013-12-05
Supplement: Supplemental_Figure14.pdf [file Supplemental_Figure14.pdf]

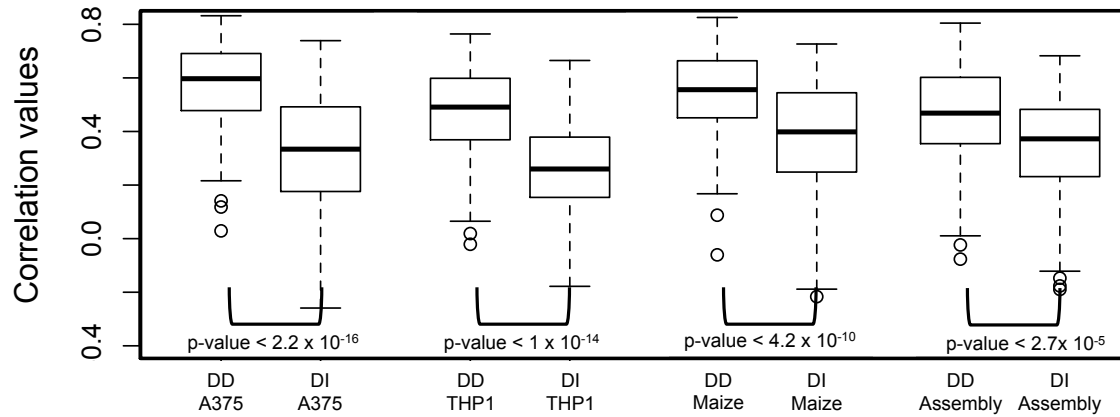

Supp. Fig. 14. Boxplot of correlations between the genes classified as DNA-directed and DNA-independent at 24 hours post KSHV reactivation with the four models: SVM trained model on nucleosome distribution from A375 cells, SVM trained model on nucleosome distribution from THP1 cells, SVM trained model on nucleosome distribution from Maize primary tissue and SVM trained model on salt dialysis assemblies. The genes classified as DNA-directed show statistically significant increase in correlation between the 24 hours and every model tested.
