# Supplementary material for: The spring-loaded genome: Nucleosome redistributions are widespread, transient, and DNA-directed
Source: HighWire-hosted journal article supplement (doi:10.1101/gr.160150.113), 2013-12-05
Supplement: Supplemental_Figure15.pdf [file Supplemental_Figure15.pdf]

Sexton et al. \_ Supplementary Figure 15

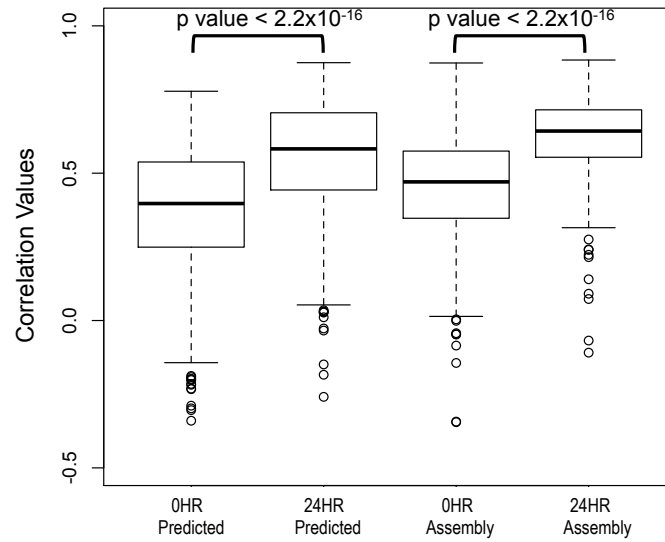

Supp. Fig. 15. Boxplots showing correlations between the predicted, *in silico*, and assembly, *in vitro*, with the 24 hours and 0 hours for all genes tested. The 24 hours shows a higher correlation with the predicted and assembly when compared to the 0 hours.
