# Supplementary material for: The spring-loaded genome: Nucleosome redistributions are widespread, transient, and DNA-directed
Source: HighWire-hosted journal article supplement (doi:10.1101/gr.160150.113), 2013-12-05
Supplement: Supplemental_Figure16.pdf [file Supplemental_Figure16.pdf]

Sexton et al. \_ Supplementary Figure 16

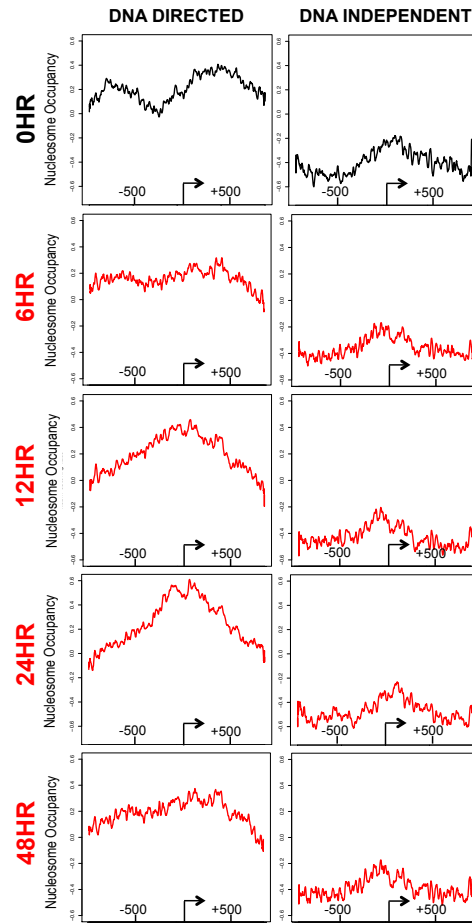

Supp. Fig. 16. Average values for all genes identified as DNA directed (left column) and DNA independent (second column) calculated by alignment of loci to the TSS for each of: *in vivo* observed 0 hours (black), 6 hours (red), 12 hours (red), 24 hours (red), and 48 hours (red).
