# Supplementary figures and images for: The spring-loaded genome: Nucleosome redistributions are widespread, transient, and DNA-directed
Source: HighWire-hosted journal article supplement (doi:10.1101/gr.160150.113), 2013-12-05

## Sexton et al. \_ Supplementary Figure 2

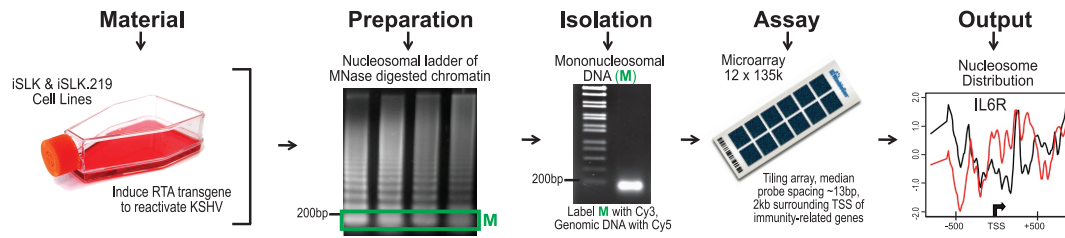

Supp. Fig. 2. Schematic of experimental methods.

Supplement: Supplemental_Figure2.pdf [file Supplemental_Figure2.pdf]
